# Supplementary figures and images for: Cell line-based xenograft mouse model of paediatric glioma stem cells mirrors the clinical course of the patient
Source: PubMed Central journal article supplement — Carcinogenesis. 2018 Jun 30;39(10):1304–9. doi: 10.1093/carcin/bgy091 (PMC6175027; doi:10.1093/carcin/bgy091), 2018-06-30

GU-pBT-7-X

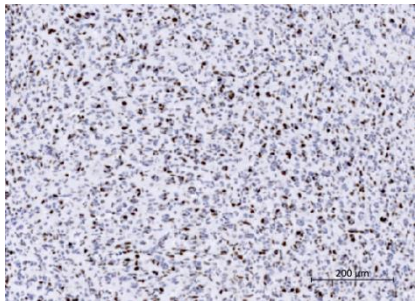

GU-pBT-10-X

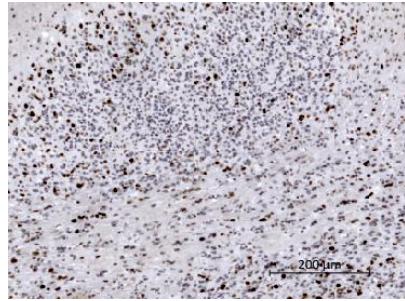

GU-pBT-15-X

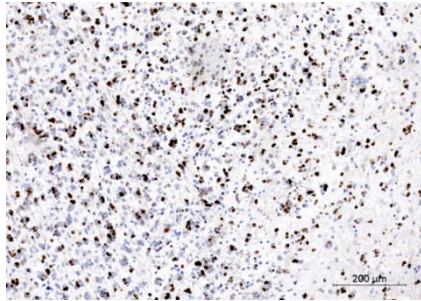

GU-pBT-19-X

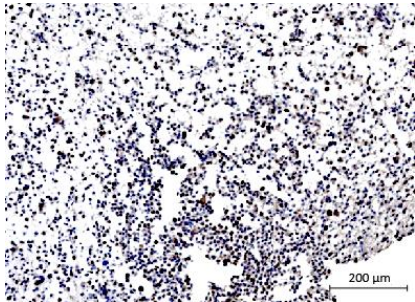

GU-pBT-23-X

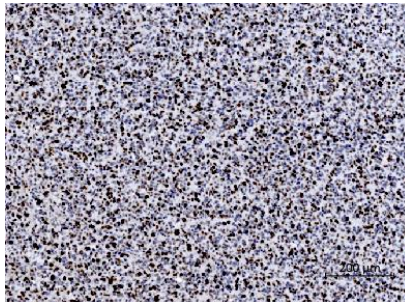

GU-pBT-28-X

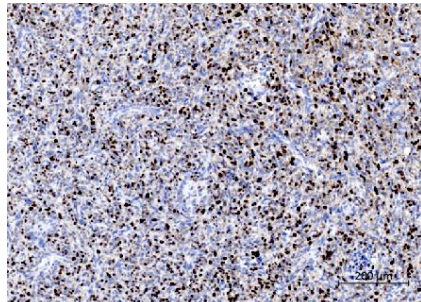

Supplement: bgy091_suppl_supplementary_figure_1.pdf [file bgy091_suppl_supplementary_figure_1.pdf]
